# Supplementary material for: In situ chemical formation of iron phthalocyanine (FePc) monolayer on the surface of magnetite nanoparticles
Source: Royal Society of Chemistry journal article supplement (doi:10.1039/b700219j), 2007-01-01
Supplement: b700219j.pdf [file b700219j.pdf]

# Supplementary Material (ESI) for New Journal of Chemistry  
# This journal is (c) The Royal Society of Chemistry and  
# The Centre National de la Recherche Scientifique, 2007

## ***In situ* Chemical Formation of Iron Phthalocyanine (FePc)**

### **Monolayer On the Surface of Magnetite Nanoparticles**

Shiyong Liu,<sup>a</sup> Xuanzhen Jiang,<sup>\*a</sup> and Guanglan Zhuo.<sup>b</sup>

<sup>a</sup> Department of Chemistry, Zhejiang University, Hangzhou city, PR China 310027

<sup>b</sup> Department of Applied Chemistry, Zhejiang Sci-Tech University, Hangzhou city, PR China 310027

#### **Electronic Supplementary Information**

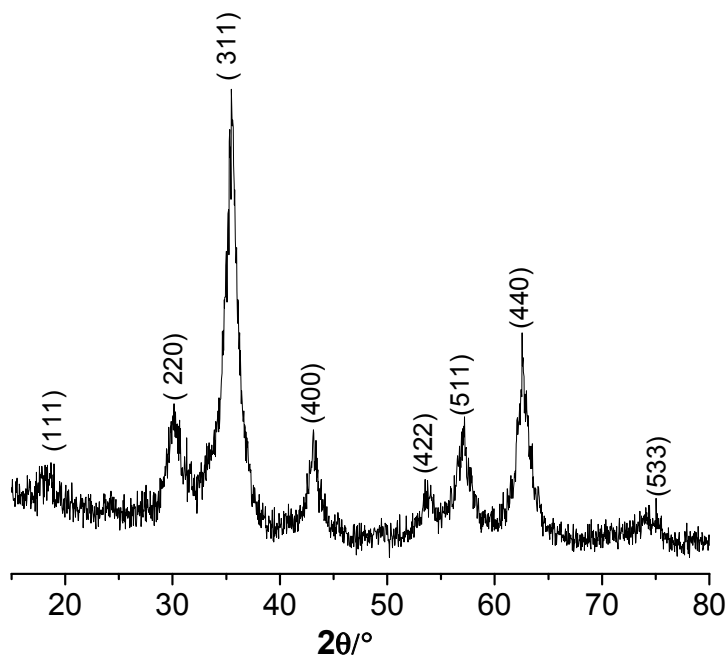

**Fig. 1** Powder X-ray diffraction pattern of the Fe<sub>3</sub>O<sub>4</sub> NPs.

# Supplementary Material (ESI) for New Journal of Chemistry  
# This journal is (c) The Royal Society of Chemistry and  
# The Centre National de la Recherche Scientifique, 2007

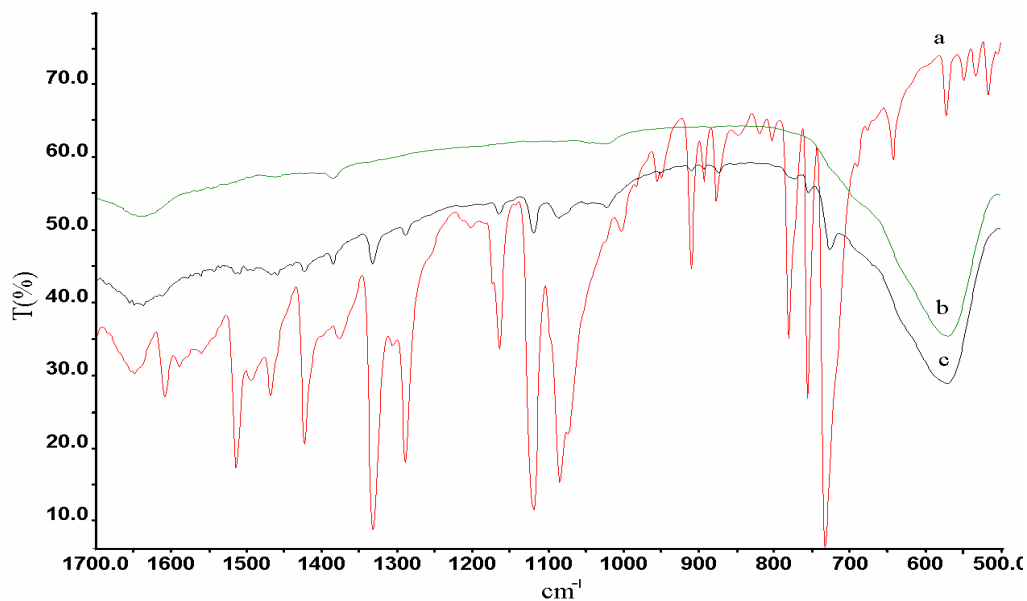

**Fig. 2** FTIR spectra of (a) the neat FePc, (c) the Fe<sub>3</sub>O<sub>4</sub> NPs coated by FePc through physical method, and (b) after being washed by DMF under sonication for physical-method-derived FePc@ Fe<sub>3</sub>O<sub>4</sub>.

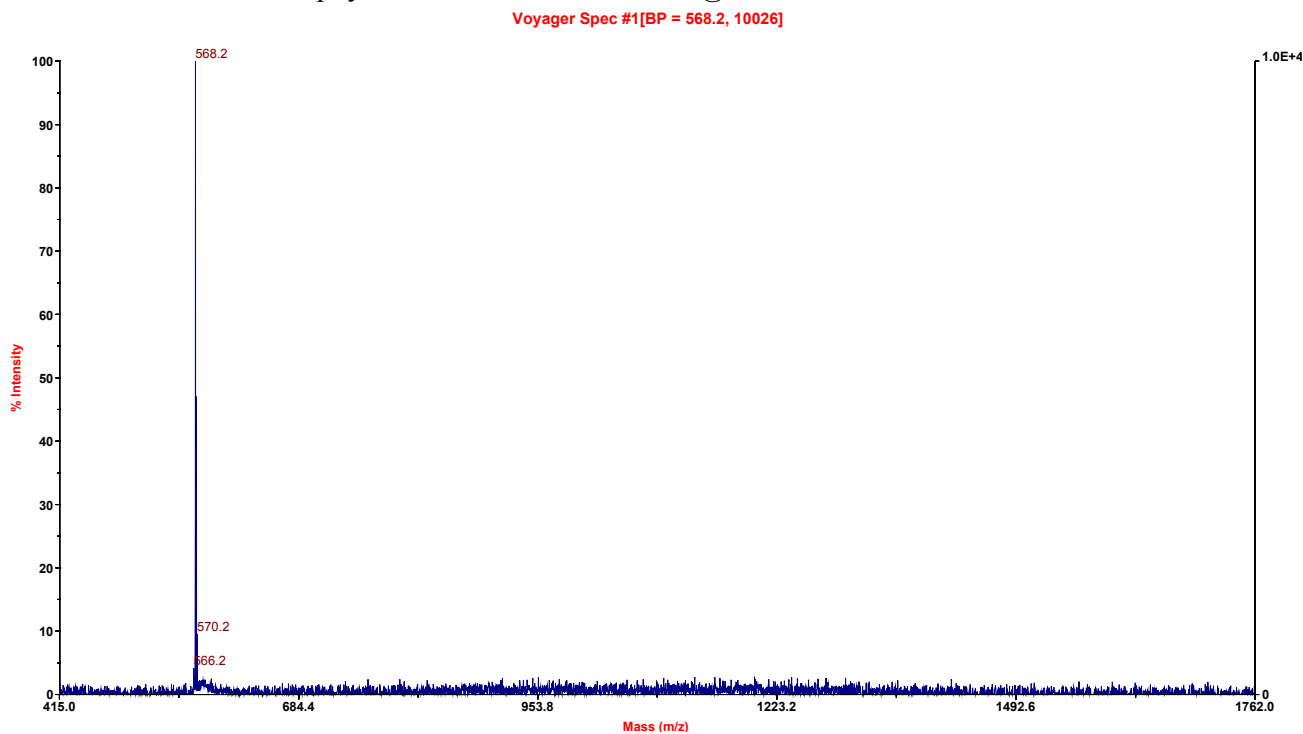

**Fig. 3** Mass spectrometry (SATURN 2000) of FePc (after dissolving the FePc@Fe<sub>3</sub>O<sub>4</sub> nanoparticle core in HCl). Peak positions of molecular ions is consistent exactly with the molecular weight of FePc, indicating the *in situ* formation of iron phthalocyanine.
